# Supplementary material for: Dwindling Groundwater Reserves Will Threaten Mountain Streamflow in a Warmer World
Source: Research Square preprint supplement (doi:10.21203/rs.3.rs-3405349/v1), 2023-11-10
Supplement: Supplementary file 1 [file b2aae2803b7ad0cc222f456e.xlsx]

## Sheet: Table_S1
Table S1: Data description and source links for model development with parameters used for the multiple regression (MLR) analysis defined
Data Type	Station/Descrip.	Org.a	Loc. ID	Parameter(s)	Reso.	area (km2)	datesb	elev. (m)	Lat.	long.	MLR ID	MLR Description (units)	Data Source Link
Elevation	DEM	USGS	East River		10 m	750	2014-06-06	-	-	-			https://apps.nationalmap.gov/downloader/
Elevation	DEM	USGS	UCRB		30 m	372134	2014-06-06				elev	(m)
											aspect	(degrees)
											slope	(degrees)
											east1	sin(aspect*PI/180)*sin(slope*PI/180)
											north1	cos(aspect*PI/180)*sin(slope*PI/180)
											east2	sin(aspect*PI/180)
											north2	cos(aspect*PI/180)
											TWI	natural log (flow accumuation/tan(slope)+0.01)
											relief	max. elevation - min. elevation
											f3200	fraction area >3200 m
											fLSA	2800 m < fraction area <3200 m
stream	NHD	USGS	UCRB		-	372134	2023-02-24	-	-	-	np	length non-perennial streams (km)	https://apps.nationalmap.gov/downloader/
											p	length perennial streams (km)
											ts	total stream length (km)
											totaldd	total stream length/area (1/km)
											pdd	pernnial stream length/area (1/km)
basins	NHD	USGS	UCRB		-	372134	2015-04-30	-	-	-	area	(km2)	https://apps.nationalmap.gov/downloader/
Precip, Temp	Schofield SNOTEL	NRCS	737	Precipitation, Temperature	daily	point	1986-2022	3252.3	39.0152	-107.049			https://wcc.sc.egov.usda.gov/nwcc/site?sitenum=737
	Butte SNOTEL	NRCS	380	Precipitation, Temperature	daily	point	1986-2022	3102.73	38.8943	-106.953			https://wcc.sc.egov.usda.gov/nwcc/site?sitenum=380
Solar radiation, snow depth	Snodgrassc	RMBL	SG-SMT1	Solar Radiation, snow depth	daily	point	2015-2018	3328.16	38.9295	-106.986			https://www.digitalrmbl.org/collections/weather-stations/
	Judd Fallsc	RMBL	ER-JDF1	Solar Radiation, snow depth	daily	point	2015-2018	2975.59	38.9607	-106.984			https://www.digitalrmbl.org/collections/weather-stations/
	billy barrc	RMBL	ER-BLB1	Solar Radiation, snow depth	daily	point	2015-2018	2902.17	38.9602	-106.991			https://www.digitalrmbl.org/collections/weather-stations/
	Kettle Pondsc	RMBL	ER-KLP1	Solar Radiation, snow depth	daily	point	2015-2018	2838.19	38.9399	-106.972			https://www.digitalrmbl.org/collections/weather-stations/
ET	Eddy Covariance	SFA	ER-PFT1	latent heat flux	daily	point	2017-2019	2760.43	38.9229	-106.952			https://doi.org/10.1002/hyp.14449
SWE	Airborne Lidar	ASO, inc.	-	Snow Water Equivlant, Snow Depth	50 m	750	2016-2019	-	-	-			https://data.airbornesnowobservatories.com/
	snowpits	SFA	-			point	2016-2020	-	-	-			https://data.ess-dive.lbl.gov/view/doi:10.15485/1824223
precip.	PRISM	OSU	-	precipitation	800 m	750	2015-04-30	-	-	-			https://prism.oregonstate.edu/
							2023-09-28				PPT	annual precipiatation (mm)	https://prism.oregonstate.edu/
Vapor pressure deficit											VPDMN, VPDMX	minimum (MN) and maximum (MX)
air temperature											TMN, TMX, TAVG	minimum (MN) , maximum (MX) and average (AVG)
solar radiation											Srsol	Solor radation on a slope
groundwater	GSFLOW derived				100 m	750					dWT	change in water table elevation wy 2022 (m)
	(historical - warming)
cover type, cover density	Vegetation Maps	USGS	UCRB	cover type, canopy density, canopy storage, transmission parameters, rooting depth	30 m	372134	2021-03-12	-	-	-			https://www.landfire.gov/viewer/
											fb	fraction area bare ground
											fg	fraction area grass
											fgb	fraction area grass + bare ground
											fshrub	fraction area shurb
											fhardwood	fraction area hardwood forest
											fconifer	fraction area conifer
											ff	fraction area forest
											trncfall	winter transmission coefficient of all veg = 0.9917 * exp(-2.7557 * covden_win)
											trncff1	winter transmission coefficient of forest (all else assigned 1)
											trncf	winter transmission coefficient of the forest (all else = NULL)
	NEON flight	SFA	East River		1 m	400	2018	-	-	-			https://doi.org/10.15485/1602034
soil	Soil Maps	NRCS	East River	available water content	na	750	2021-03-12	-	-	-			https://websoilsurvey.nrcs.usda.gov/app/WebSoilSurvey.aspx
streamflow	East Above Quigley	SFA	ER-EAQ1	streamflow	daily	5.3	2014-2018	2983.96	38.9952	-107.015			https://doi.org/10.21952/WTR/1495380
							2019-2021						https://doi.org/10.15485/1779721
	Quigley	SFA	ER-QLY1	streamflow	daily	2.6	2014-2018	2981.63	38.9934	-107.014			https://doi.org/10.15485/1779721
	Rustlers	SFA	ER-RUS1	streamflow	daily	14.8	2014-2018	2952.39	38.9889	-107.008			https://doi.org/10.21952/WTR/1495380
							2019-2021						https://doi.org/10.15485/1779721
	Bradely	SFA	ER-BRD1	streamflow	daily	3.8	2014-2018	2939.9	38.9854	-107.005			https://doi.org/10.21952/WTR/1495380
							2019-2021						https://doi.org/10.15485/1779721
	Rock	SFA	ER-RCK1	streamflow	daily	3.6	2014-2018	2933.69	38.9817	-107.006			https://doi.org/10.21952/WTR/1495380
							2019-2021						https://doi.org/10.15485/1779721
	Gothic	SFA	ER-GTH1	streamflow	daily	0.9	2014-2018	2935.22	38.9785	-107.005			https://doi.org/10.21952/WTR/1495380
							2019-2021						https://doi.org/10.15485/1779721
	Copper	SFA	ER-CPR1	streamflow	daily	23.7	2014-2018	2884.74	38.9571	-106.988			https://doi.org/10.21952/WTR/1495380
							2019-2022						https://doi.org/10.15485/1779721
	East Below Copper	SFA	ER-EBC1	streamflow	daily	69.8	2014-2018	2864.92	38.9524	-106.989			https://doi.org/10.21952/WTR/1495380
							2019-2022						https://doi.org/10.15485/1779721
	Pumphouse	SFA	ER-PHF0	streamflow	daily	84.7	2014-2018	2759.57	38.9224	-106.951			https://doi.org/10.21952/WTR/1495380
							2019-2022						https://doi.org/10.15485/1779721
	Washington Gulch	SFA	-	streamflow	daily	17.2	2016-2017	2894	38.9221	107.005			https://doi.org/10.21952/WTR/1495380
	Elk Creek	USGS	9110990	streamflow	daily	4.4	2017-2022	2916.96	38.8567	-107.06			https://waterdata.usgs.gov/nwis/inventory?agency_code=USGS&site_no=09110990
	Coal Creek	USGS	9111250	streamflow	daily	53.2	2014-2022	2713.66	38.8716	-106.985			https://waterdata.usgs.gov/nwis/inventory?agency_code=USGS&site_no=09111250
	Slate at Baxter	USGS	385106106571000	streamflow	daily	190.26	2006-2022	2685.31	38.8517	-106.953			https://waterdata.usgs.gov/nwis/inventory?agency_code=USGS&site_no=385106106571000
	East below Cement	USGS	9112200	streamflow	daily	619.512	1986-2022	2572.54	38.7842	-106.87			https://waterdata.usgs.gov/nwis/inventory?agency_code=USGS&site_no=09112200
	East at Almont	USGS	9112500	streamflow	daily	750	1986-2022	2440.34	38.6642	-106.847			https://waterdata.usgs.gov/nwis/inventory?agency_code=USGS&site_no=09112500
lithology	Oh-Be-Joyful	USGS	1891	hydrostratigraphic units	1:24K	-	2020-02-15	-	-	-			https://ngmdb.usgs.gov/Prodesc/proddesc_1891.htm
	Gothic	USGS	1199		1:24K	-	2020-02-16	-	-	-			https://ngmdb.usgs.gov/Prodesc/proddesc_1199.htm
	Snowmass	USGS	2155		1:24K	-	2020-02-17	-	-	-			https://ngmdb.usgs.gov/Prodesc/proddesc_2155.htm
	Maroon Bells	USGS	2090	hydrostratigraphic units	1:24K	-	2020-02-18	-	-	-			https://ngmdb.usgs.gov/Prodesc/proddesc_2090.htm
	Crested Butte	USGS	1111		1:24K	-	2020-02-19	-	-	-			https://ngmdb.usgs.gov/Prodesc/proddesc_1111.htm
	Axtell	USGS	1129		1:24K	-	2020-02-20	-	-	-			https://ngmdb.usgs.gov/Prodesc/proddesc_1129.htm
	Gunnison	USGS	46593		1:150K	-	2020-02-21	-	-	-			https://ngmdb.usgs.gov/Prodesc/proddesc_46593.htm
	Hydraulic Conductivity	model derived	Layer 1 - Layer 6			100 m					K1 - K6	averaged across each HUC12 basin
resistivity	Airborne EM	USGS	East River	Electrical Resistivity	variable	483		-	-	-			https://www.sciencebase.gov/catalog/item/5f4d802d82ce4c3d123191ff
groundwater	water level	WSC	Upper Gunnison	Water levels	steady	point		-	-	-			available upon request
		SFA	ER-PLM1	Water Levels	sub-daily	point	2016-2022	2787.16	38.9198	-106.949			https://data.ess-dive.lbl.gov/datasets/doi:10.15485/1866836
		SFA	ER-PLM6		sub-daily	point	2016-2022	2759.65	38.9208	-106.948			https://data.ess-dive.lbl.gov/datasets/doi:10.15485/1866836
		SFA	SG-SNI4		dry	point	2021	3358.96	38.9323	-106.986
aOrganizations USGS = U.S. Geologcial Survey; SFA = Lawrence Berkeley National Laboratory Science Focus Area; WCU = Western Colorado University; RMBL = Rocky Mountain Biological Laboratory; NRCS=National Resources Conservation Service; ASO = Airborne Snow Observatory; OSU = Oregon State University
bdates used for model constraint and/or date of data download
cdata taken from SFA data portal but open to public with RMBL (free) access
